# Supplementary material for: Population Pharmacokinetics and Exposure–Response Analysis for the Phase 3 COSMIC-311 Trial of Cabozantinib for Radioiodine-Refractory Differentiated Thyroid Cancer
Source: PubMed Central journal article supplement — Clin Pharmacokinet. 2023 Mar 4;62(4):587–98. doi: 10.1007/s40262-023-01210-0 (PMC10085936; doi:10.1007/s40262-023-01210-0), 2023-03-04
Supplement: 40262_2023_1210_MOESM1_ESM.pdf [file 40262_2023_1210_MOESM1_ESM.pdf]

## Supplementary Material

### Population Pharmacokinetics and Exposure-Response Analysis for the Phase 3 COSMIC-311 Trial of Cabozantinib for Radioiodine-Refractory Differentiated Thyroid Cancer

Neang S. Ly, Jing Li, Raffaella Faggioni, Lorin K. Roskos, Marcia S. Brose

#### Corresponding author:

Neang S. Ly, PhD

Exelixis, Inc. Alameda, CA, USA

Email: [nly@exelixis.com](mailto:nly@exelixis.com)

**Journal:** Clinical Pharmacokinetics

#### Table of Contents

|                                                                                                                                                                               |    |
|-------------------------------------------------------------------------------------------------------------------------------------------------------------------------------|----|
| <b>Population Pharmacokinetics Base Model Equations</b> .....                                                                                                                 | 2  |
| <b>Explanation for choice of covariates included in Pharmacokinetics full model</b> .....                                                                                     | 2  |
| <b>Population Pharmacokinetics full model equations</b> .....                                                                                                                 | 2  |
| <b>Adolescent simulation (allometric scaling) equations</b> .....                                                                                                             | 3  |
| <b>Table S1</b> Summary of studies of cabozantinib tablet formulation included in the cabozantinib population pharmacokinetic analysis .....                                  | 4  |
| <b>Table S2</b> Summary of covariate information for studies included in population pharmacokinetic model ..                                                                  | 5  |
| <b>Table S3</b> Summary of predicted exposure measures in adults at steady state following 60 mg cabozantinib once daily.....                                                 | 7  |
| <b>Table S4</b> Summary of number of events and number of patients at risk for time-to- .....                                                                                 | 8  |
| event endpoints in COSMIC-311 .....                                                                                                                                           | 8  |
| <b>Fig. S1</b> Impact of covariates on $AUC_{0-24,ss}$ ( <b>A</b> ), $C_{max,ss}$ ( <b>B</b> ), $C_{min,ss}$ ( <b>C</b> ), $CL/F$ ( <b>D</b> ), and $Vc/F$ ( <b>E</b> ) ..... | 9  |
| <b>Fig. S2</b> Kaplan-Meier plot for cabozantinib dose modification using CAVG1W .....                                                                                        | 10 |
| <b>Fig. S3</b> Kaplan-Meier plot for hypertension (BP data, Grade $\geq 3$ ) by average exposure tertile.....                                                                 | 11 |
| <b>Fig. S4</b> Kaplan-Meier plot for hypertension (MedDRA, Grade $\geq 3$ ) by average exposure tertile.....                                                                  | 12 |
| <b>Fig. S5</b> Kaplan-Meier plot for fatigue/asthenia (Grade $\geq 3$ ) by average exposure tertile.....                                                                      | 13 |
| <b>Fig. S6</b> Kaplan-Meier plot for PPE (Grade $\geq 1$ ) by average exposure tertile .....                                                                                  | 14 |
| <b>Fig. S7</b> Kaplan-Meier plot for diarrhea (Grade $\geq 3$ ) by average exposure tertile.....                                                                              | 15 |
| <b>Fig. S8</b> Kaplan-Meier plot for nausea/vomiting (Grade $\geq 3$ ) by average exposure tertile.....                                                                       | 16 |
| <b>Fig. S9</b> Kaplan-Meier plot for mucositis/stomatitis (Grade $\geq 3$ ) by average exposure tertile .....                                                                 | 17 |
| <b>Fig. S10</b> Kaplan-Meier plot for ALT/AST elevation (Grade $\geq 3$ ) by average exposure tertile.....                                                                    | 18 |

## Population Pharmacokinetics Base Model Equations

$$\frac{CL}{F_i} = 1.99 \cdot \exp(\eta_i^{CL/F}) \quad \text{Eq.1}$$

Where  $CL/F$  is the apparent oral clearance of cabozantinib for the  $i^{th}$  individual, 1.99 L/hr is the population estimate for cabozantinib apparent oral clearance, and  $\eta_i^{CL/F}$  is the interindividual variability (IIV) in  $CL/F$  for the  $i^{th}$  subject.

$$\frac{Vc}{F} = 111 \cdot \exp(\eta_i^{Vc/F}) \quad \text{Eq.2}$$

Where  $Vc/F$  is the apparent distribution volume of the plasma compartment of cabozantinib for the  $i^{th}$  individual, 111 L is the population estimate for cabozantinib apparent distribution volume of the plasma compartment, and  $\eta_i^{Vc/F}$  is the IIV in  $Vc/F$  for the  $i^{th}$  subject.

$$Ka = 3.38 \cdot \exp(\eta_i^{Ka}) \quad \text{Eq.3}$$

Where  $Ka$  is the first-order absorption rate constant of cabozantinib for the  $i^{th}$  individual, 3.38 hr<sup>-1</sup> is the population estimate for the cabozantinib absorption rate constant, and  $\eta_i^{Ka}$  is the IIV in  $Ka$  for the  $i^{th}$  subject.

$$F4 = 1 - 0.736 \quad \text{Eq.4}$$

Where  $F4$  is the fraction of dose undergoing delayed absorption and 0.736 is the fraction of dose being absorbed via the transit absorption process, assuming an oral bioavailability of 1 in the model.

## Explanation for choice of covariates included in Pharmacokinetics full model

Clinical judgment, mechanistic plausibility, and prior modeling experience were used to determine which covariates should be tested and on which model parameters they should be evaluated. Among the demographic covariates that were evaluated in a previous PopPK model developed from data in 11 clinical trials (data courtesy of Exelixis), female sex had a significant effect on  $CL/F$  (24% lower than males) which resulted in moderately increased exposure (26% higher maximum steady state plasma concentration [ $C_{max,ss}$ ], 34% higher minimum steady state plasma concentration [ $C_{min,ss}$ ], and 30% higher steady state 24-hour area under the concentration time curve [ $AUC_{0-24,ss}$ ]). Body weight was selected in consideration of cabozantinib exposure prediction in adolescent patients and due to its association with effects on  $Vc/F$ : (~40% increase in  $Vc/F$  with high body weight [109 kg] and ~40% decrease in  $Vc/F$  with low body weight [54 kg], relative to reference body weight [80 kg]), though this did not appear to impact cabozantinib exposure.

## Population Pharmacokinetics full model equations

Equations for the PK full model are identical to the base model with the addition of the following parameters:

$$\frac{CL}{F} = \theta_{CL} \cdot \left(\frac{WT}{70}\right)^{\theta_{WT,CL}} \cdot (1 + SEX \cdot \theta_{SEX}) \quad \text{Eq.5}$$

where terms are defined as indicated for base model in Supplementary Material (page 2) and in addition,  $\theta_{WT,CL}$  is the exponent describing the relationship between cabozantinib oral clearance and baseline body weight (WT) centered on a body weight of 70 kg, SEX is an indicator variable (1 for females and 0 for males) and  $\theta_{SEX}$  is the fractional change in cabozantinib oral clearance for females

$$\frac{Vc}{F} = \theta_{Vc} \cdot \left(\frac{WT}{70}\right)^{\theta_{WT,Vc}} \quad \text{Eq.6}$$

where  $\theta_{WT,Vc}$  is the exponent describing the relationship between cabozantinib apparent distribution volume (Vc/F) for the plasma compartment and baseline body weight (WT) centered on a body weight of 70 kg

#### **Adolescent simulation (allometric scaling) equations**

$$CL_{adolescent} = CL_{adult} \cdot \left(\frac{WT}{70}\right)^{0.75} \quad \text{Eq.7}$$

$$Vc_{adolescent} = Vc_{adult} \cdot \left(\frac{WT}{70}\right)^1 \quad \text{Eq.8}$$

CL clearance, Vc central distribution volume, WT body weight in kilograms (with a reference weight of 70 kg)

**Table S1** Summary of studies of cabozantinib tablet formulation included in the cabozantinib population pharmacokinetic analysis

| <b>Study</b>           | <b>Design</b>                                                                                                                                                                                                                  | <b>Subject Type</b> | <b>Nominal Doses</b>                                                | <b>Planned PK Sampling</b>                                                                                                   |
|------------------------|--------------------------------------------------------------------------------------------------------------------------------------------------------------------------------------------------------------------------------|---------------------|---------------------------------------------------------------------|------------------------------------------------------------------------------------------------------------------------------|
| XL184-020 <sup>a</sup> | Phase 1 pharmacokinetic study of cabozantinib (XL184) tablet formulation in healthy adult volunteers                                                                                                                           | Healthy volunteers  | 20, 40, 60 mg, single dose                                          | Pre-dose and 0.5, 1, 2, 3, 4, 5, 6, 8, 10, 14, 24, 48, 72, 120, 168, 240, 288, 336, 408, and, 504 hours post-dose            |
| XL184-306              | Phase 3, randomized, double-blind, controlled trial of cabozantinib (XL184) vs. mitoxantrone plus prednisone in men with previously treated symptomatic CRPC                                                                   | Patients with CRPC  | 60 mg QD                                                            | Week 1 Day 1, Week 4 Day 1, Week 7 Day 1, and Week 13 Day 1                                                                  |
| XL184-307              | Phase 3, randomized, double-blind, controlled study of cabozantinib (XL184) vs. prednisone in patients with metastatic castration-resistant prostate cancer who have received prior docetaxel and prior abiraterone or MDV3100 | Patients with CRPC  | 60 mg QD                                                            | End of Week 3 and end of Week 12                                                                                             |
| XL184-308              | Phase 3, randomized, controlled study of cabozantinib (XL184) vs everolimus in patients with metastatic renal cell carcinoma (RCC) that has progressed after prior VEGFR tyrosine kinase inhibitor therapy                     | Patients with RCC   | 60 mg cabozantinib tablets PO QD                                    | ~8 or more hours after the prior evening dose on the W5D1 (Day 29) and W9D1 (Day 57) visits                                  |
| XL184-309              | Phase 3, randomized, double-blind, controlled study of cabozantinib (XL184) vs placebo in patients with HCC who have received prior sorafenib                                                                                  | Patients with HCC   | 60 mg cabozantinib tablets PO QD                                    | ~8 or more hours after the previous dose of study treatment on the W3D1, W5D1, and W9D1 visits                               |
| XL184-311              | Phase 3, randomized, double-blind, controlled study of cabozantinib (XL184) in patients with radioiodine-refractory differentiated thyroid cancer (DTC) who have progressed after prior VEGFR-targeted therapy                 | Patients with DTC   | 60 mg cabozantinib tablets PO QD                                    | ~8 or more hours after the previous dose of study treatment on the W3D1, W5D1, and W9D1 visits                               |
| CheckMate 9ER          | Phase 3, randomized, open-label study of nivolumab combined with cabozantinib versus sunitinib in patients with previously untreated advanced or metastatic RCC                                                                | Patients with RCC   | 40 mg cabozantinib tablets PO QD with nivolumab combination therapy | Pre-dose (Cycle 1, Day 1) and on Day 1 of Cycles 3, 4 and 7 (cycle = 2 weeks), ~8 or more hours after the prior evening dose |

<sup>a</sup>XL184-020 was the only study to have morning dosing and serial PK sampling; other studies had evening dosing and sparse PK sampling

*C* cycle, *CRPC* castration-resistant prostate cancer, *D* day, *DTC* differentiated thyroid cancer, *HCC* hepatocellular carcinoma, *hr* hour, *MDV3100* enzalutamide, *PK* pharmacokinetic, *PO* oral, *QD* once daily, *RCC* renal cell carcinoma, *VEGFR* vascular endothelial growth factor receptor, *W* week

**Table S2** Summary of covariate information for studies included in population pharmacokinetic model

| <b>Study</b>               | <b>XL184<br/>-020</b> | <b>XL184<br/>-306</b> | <b>XL184<br/>-307</b> | <b>XL184<br/>-308</b> | <b>XL184<br/>-309</b> | <b>XL184<br/>-311</b> | <b>CheckMate<br/>9ER</b> | <b>Total (%)</b> |
|----------------------------|-----------------------|-----------------------|-----------------------|-----------------------|-----------------------|-----------------------|--------------------------|------------------|
| N (%) of subjects          | 63<br>(3.6)           | 41<br>(2.4)           | 498<br>(28.5)         | 282<br>(16.2)         | 452<br>(25.9)         | 101<br>(5.8)          | 308<br>(17.7)            | 1745             |
| Sex                        |                       |                       |                       |                       |                       |                       |                          |                  |
| Male                       | 33                    | 41                    | 498                   | 222                   | 365                   | 45                    | 237                      | 1441 (82.6)      |
| Female                     | 30                    | 0                     | 0                     | 60                    | 87                    | 56                    | 71                       | 304 (17.4)       |
| Race                       |                       |                       |                       |                       |                       |                       |                          |                  |
| Unknown                    | 0                     | 0                     | 105                   | 11                    | 31                    | 6                     | 0                        | 153 (8.8)        |
| White                      | 62                    | 34                    | 380                   | 231                   | 253                   | 74                    | 253                      | 1287 (73.8)      |
| Black                      | 1                     | 4                     | 9                     | 5                     | 8                     | 0                     | 1                        | 28 (1.6)         |
| Asian                      | 0                     | 1                     | 1                     | 19                    | 152                   | 17                    | 26 <sup>a</sup>          | 216 (12.4)       |
| Native<br>American/Alaskan | 0                     | 0                     | 0                     | 0                     | 0                     | 2                     | 3                        | 5 (0.3)          |
| Other                      | 0                     | 2                     | 3                     | 16                    | 8                     | 2                     | 25                       | 56 (3.2)         |
| Population                 |                       |                       |                       |                       |                       |                       |                          |                  |
| Healthy                    | 63                    | 0                     | 0                     | 0                     | 0                     | 0                     | 0                        | 63 (3.6)         |
| RCC                        | 0                     | 0                     | 0                     | 282                   | 0                     | 0                     | 308                      | 590 (33.8)       |
| CRPC                       | 0                     | 41                    | 498                   | 0                     | 0                     | 0                     | 0                        | 539 (30.9)       |
| HCC                        | 0                     | 0                     | 0                     | 0                     | 452                   | 0                     | 0                        | 452 (25.9)       |
| DTC                        | 0                     | 0                     | 0                     | 0                     | 0                     | 101                   | 0                        | 101 (5.8)        |
| Age (yr)                   |                       |                       |                       |                       |                       |                       |                          |                  |
| No.                        | 63                    | 41                    | 498                   | 282                   | 452                   | 101                   | 308                      | 1745             |
| Mean                       | 36.9                  | 64.83                 | 68.79                 | 61.56                 | 63.05                 | 63.22                 | 61.33                    | 63.25            |
| Median                     | 38                    | 65                    | 69                    | 62                    | 64                    | 66                    | 62                       | 65               |
| SD                         | 8.61                  | 6.42                  | 7.61                  | 9.45                  | 10.88                 | 11.07                 | 10.26                    | 11.21            |
| Minimum                    | 19                    | 48                    | 35                    | 32                    | 22                    | 32                    | 29                       | 19               |
| Maximum                    | 54                    | 79                    | 87                    | 86                    | 86                    | 85                    | 90                       | 90               |
| Body weight (kg)           |                       |                       |                       |                       |                       |                       |                          |                  |
| No.                        | 63                    | 41                    | 492                   | 282                   | 451                   | 101                   | 308                      | 1738             |
| Mean                       | 76.42                 | 89.3                  | 83.35                 | 81.94                 | 70.78                 | 71.00                 | 81.61                    | 78.72            |
| Median                     | 76.5                  | 84.8                  | 82.3                  | 80.4                  | 68.94                 | 70.0                  | 80.15                    | 77.55            |
| SD                         | 11.8                  | 23.06                 | 14.08                 | 16.97                 | 14.97                 | 16.95                 | 17.95                    | 16.83            |
| Minimum                    | 58.1                  | 57.5                  | 49.7                  | 48.1                  | 35                    | 41                    | 36                       | 35               |

|                            |        |        |       |       |       |       |       |       |
|----------------------------|--------|--------|-------|-------|-------|-------|-------|-------|
| Maximum                    | 113.5  | 190.7  | 140   | 155.7 | 130   | 117   | 160.4 | 190.7 |
| ALT (U/L)                  |        |        |       |       |       |       |       |       |
| No.                        | 63     | 41     | 498   | 282   | 452   | 101   | 307   | 1744  |
| Mean                       | 23.25  | 19.78  | 19.75 | 21.29 | 46.39 | 20.46 | 22.6  | 27.57 |
| Median                     | 23     | 16     | 16    | 17    | 37    | 16    | 18    | 20    |
| SD                         | 10.55  | 10.96  | 14.88 | 15.69 | 33.46 | 15.02 | 14.89 | 24.00 |
| Minimum                    | 9      | 7      | 4     | 5     | 6     | 6     | 5     | 4     |
| Maximum                    | 59     | 49     | 162   | 115   | 279   | 134   | 102   | 279   |
| AST (U/L)                  |        |        |       |       |       |       |       |       |
| No.                        | 63     | 41     | 498   | 282   | 452   | 101   | 307   | 1744  |
| Mean                       | 21.08  | 29.66  | 27.22 | 22.19 | 62.21 | 21.70 | 21.11 | 33.92 |
| Median                     | 20     | 25     | 23    | 20    | 51    | 20    | 19    | 24    |
| SD                         | 6.36   | 18.14  | 15.47 | 10.43 | 39.95 | 9.37  | 9.76  | 28.57 |
| Minimum                    | 11     | 11     | 9     | 7     | 13    | 11    | 6     | 6     |
| Maximum                    | 43     | 94     | 123   | 70    | 286   | 71    | 69    | 286   |
| Bilirubin (umol/L)         |        |        |       |       |       |       |       |       |
| No.                        | 63     | 41     | 498   | 269   | 448   | 101   | 307   | 1727  |
| Mean                       | 10.15  | 6.54   | 6.89  | 7.67  | 12.75 | 7.71  | 8.93  | 9.05  |
| Median                     | 10.26  | 5      | 6     | 7     | 11    | 7     | 8.55  | 7.87  |
| SD                         | 5.05   | 3.35   | 3.23  | 3.21  | 7.57  | 3.92  | 4.26  | 5.50  |
| Minimum                    | 3.42   | 3      | 3     | 3     | 3     | 2.97  | 2.57  | 2.57  |
| Maximum                    | 30.78  | 17     | 28    | 21    | 82    | 21    | 39.33 | 82    |
| CRCL (mL/min) <sup>b</sup> |        |        |       |       |       |       |       |       |
| No.                        | 63     | 41     | 491   | 282   | 451   | 101   | 307   | 1736  |
| Mean                       | 137.73 | 110.03 | 96.92 | 77.95 | 93.01 | 88.53 | 77.74 | 90.73 |
| Median                     | 135.7  | 112.3  | 92.9  | 74.4  | 90.0  | 83.4  | 72.2  | 85.95 |
| SD                         | 26.58  | 31.60  | 31.85 | 28.06 | 31.36 | 33.50 | 27.82 | 32.81 |
| Minimum                    | 86.5   | 48.6   | 27.5  | 29.7  | 34.3  | 26.6  | 27.2  | 26.6  |
| Maximum                    | 247.1  | 179.2  | 216.0 | 183.6 | 230.2 | 182.1 | 196.5 | 247.1 |

<sup>a</sup>Of the 26 Asian patients in Study CheckMate 9ER, 22 patients were Japanese

<sup>b</sup>Creatinine clearance was estimated using the Cockcroft-Gault equation

*ALT* alanine aminotransferase, *AST* aspartate aminotransferase, *CRCL* creatinine clearance, *CRPC* castration-resistant prostate cancer, *DTC* differentiated thyroid cancer, *HCC* hepatocellular carcinoma, *No.* number, *RCC* renal cell carcinoma, *SD* standard deviation

**Table S3** Summary of predicted exposure measures in adults at steady state following 60 mg cabozantinib once daily

| Mean (SD) Exposure Parameter |                                 |                            |                            |                                 |                                 |                                 |                                           |
|------------------------------|---------------------------------|----------------------------|----------------------------|---------------------------------|---------------------------------|---------------------------------|-------------------------------------------|
|                              | Healthy Volunteers<br>XL184-020 | CRPC Patients<br>XL184-306 | CRPC Patients<br>XL184-307 | RCC Patients<br>Study XL184-308 | HCC Patients<br>Study XL184-309 | DTC Patients<br>Study XL184-311 | RCC Patients<br>Study<br>CheckMate<br>9ER |
| N                            | 63                              | 41                         | 498                        | 282                             | 452                             | 101                             | 308                                       |
| $C_{min,ss}^a$ , ng/mL       | 1206 (484)                      | 997 (356)                  | 1190 (386)                 | 1243 (429)                      | 1301 (539)                      | 1421 (455)                      | 1290 (481)                                |
| $C_{max,ss}$ , ng/mL         | 1488 (640)                      | 1230 (348)                 | 1435 (390)                 | 1503 (455)                      | 1636 (566)                      | 1771 (512)                      | 1559 (510)                                |
| $AUC_{ss}$ , ng·h/mL         | 30441 (12224)                   | 25328 (8545)               | 30042 (9302)               | 31359 (10395)                   | 32957 (13017)                   | 35915 (11099)                   | 32496 (11659)                             |

<sup>a</sup> $C_{min}$  concentrations are the pre-dose concentrations at steady state

$AUC_{ss}$  steady state area under the concentration-time profile,  $C_{max,ss}$  steady state maximum plasma drug concentration,  $C_{min,ss}$  steady state minimum plasma drug concentration, *CRPC* castration-resistant prostate cancer, *DTC* differentiated thyroid cancer, *HCC* hepatocellular carcinoma; *SD* standard deviation, *RCC* renal cell carcinoma

**Table S4** Summary of number of events and number of patients at risk for time-to-

event endpoints in COSMIC-311

| Endpoint                                                     | Patients receiving at least one dose of cabozantinib and with at least one measurable cabozantinib concentration |                                  |
|--------------------------------------------------------------|------------------------------------------------------------------------------------------------------------------|----------------------------------|
|                                                              | Number of events <sup>a</sup>                                                                                    | Total Number of Patients at Risk |
| Progression-free survival <sup>b</sup>                       | 29                                                                                                               | 98 <sup>g</sup>                  |
| Cabozantinib dose modification <sup>c</sup>                  | 92                                                                                                               | 114 <sup>h</sup>                 |
| Palmar-plantar erythrodysesthesia (Grade $\geq 1$ )          | 55                                                                                                               | 115                              |
| Diarrhea (Grade $\geq 3$ )                                   | 9                                                                                                                | 115                              |
| Hypertension <sup>d</sup> (VS source data) (Grade $\geq 3$ ) | 24                                                                                                               | 115                              |
| Hypertension <sup>e</sup> (MedDRA terms) (Grade $\geq 3$ )   | 11                                                                                                               | 115                              |
| Fatigue/asthenia (Grade $\geq 3$ )                           | 13                                                                                                               | 115                              |
| Nausea/vomiting (Grade $\geq 3$ )                            | 5                                                                                                                | 115                              |
| Oral mucositis/stomatitis (Grade $\geq 3$ )                  | 6                                                                                                                | 115                              |
| ALT/AST Elevation <sup>f</sup> (CTCAE v5) (Grade $\geq 3$ )  | 1                                                                                                                | 110 <sup>i</sup>                 |

<sup>a</sup>One event counted per endpoint per patient (data cut-off: August 19, 2020)<sup>b</sup>For the endpoint of progression free survival, an event is defined as disease progression or death<sup>c</sup>Dose reductions or holds<sup>d</sup>Systolic BP  $\geq 160$  mmHg or diastolic BP  $\geq 100$  mmHg, based on VS source data<sup>e</sup>Systolic BP  $\geq 160$  mmHg or diastolic BP  $\geq 100$  mmHg, based on MedDRA terms<sup>f</sup>Per CTCAEv5 criteria for ALT/AST elevation<sup>g</sup>For the analysis of progression free survival, patients were also required to have a valid baseline tumor assessment and at least one evaluable post-baseline tumor assessment<sup>h</sup>Of the total 115 patients, one patient had a dose modification in the first week post dose and was excluded<sup>i</sup>Of the total 115 patients with at least one measurable PK concentration, 110 had valid post-baseline ALT/AST measurements

*ALT* alanine aminotransferase, *AST* aspartate aminotransferase, *BP* blood pressure, *CTCAE* common terminology criteria for adverse events, *MedDRA* medical dictionary for regulatory activities, *VS* vital signs



**Fig. S1** Impact of covariates on  $AUC_{0-24,ss}$  (A),  $C_{max,ss}$  (B),  $C_{min,ss}$  (C),  $CL/F$  (D), and  $Vc/F$  (E)

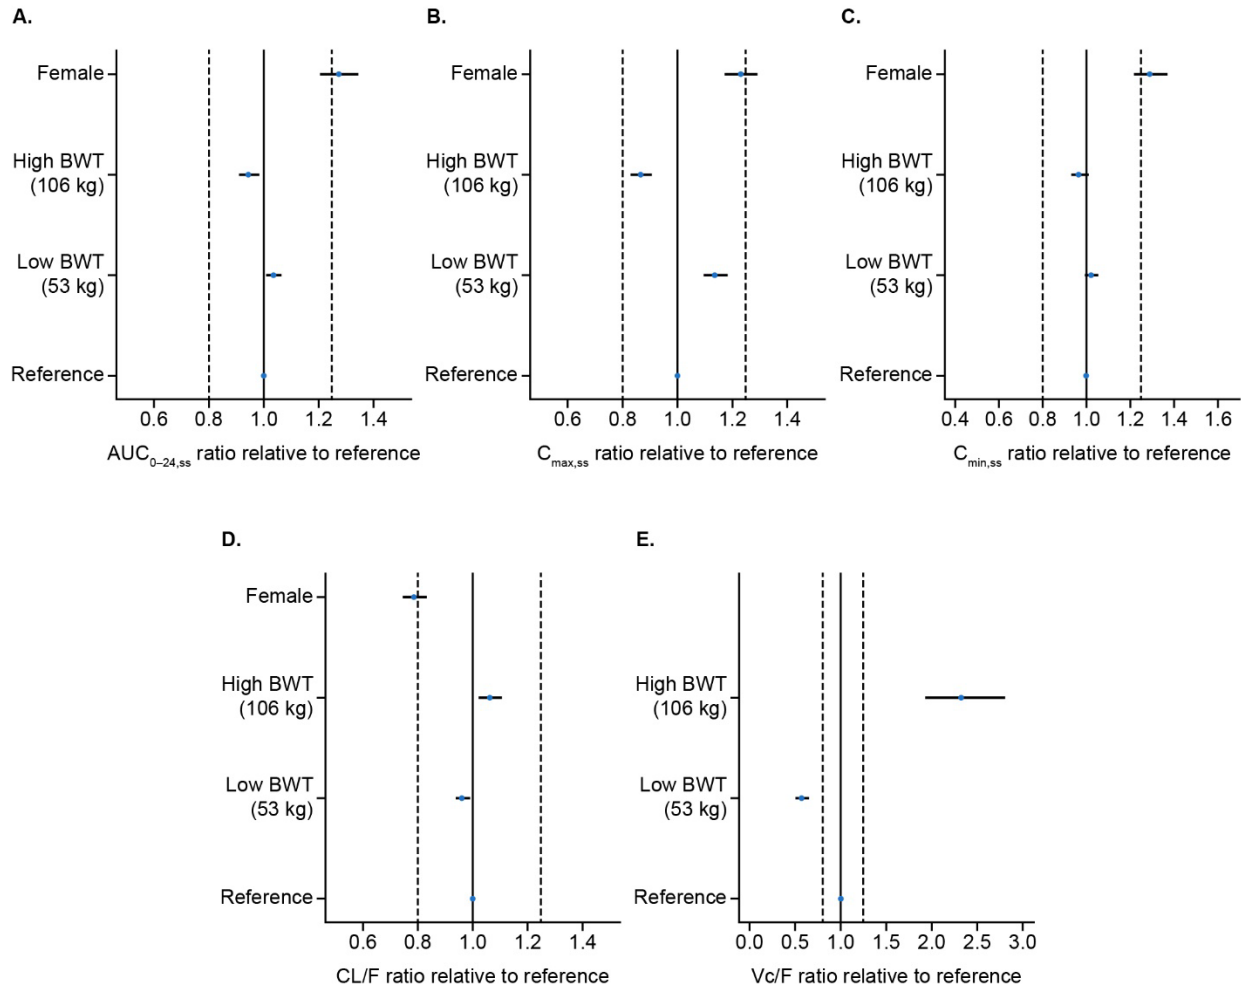

**Note:** A reference patient (Reference) was defined as a male patient with DTC and a BWT of 70 kg. other test conditions are defined as follows: Low BWT: a patient with BWT of 53 kg. High BWT: a patient with BWT of 106 kg

Blue solid circles show the ratio of the typical parameter value under the test conditions compared to the reference patient, and the line segments represent the corresponding 90% CI. Vertical dashed lines indicate the interval between ratios of 0.8 to 1.25

$AUC_{0-24,ss}$  steady state area under the concentration-time profile during one dosing interval (ng·hr/mL),  $BWT$  body weight,  $CI$  confidence interval,  $C_{max,ss}$  steady state maximum plasma drug concentration (ng/mL),  $C_{min,ss}$  pre-dose plasma drug concentrations at steady state (ng/mL)

Fig. S2 Kaplan-Meier plot for cabozantinib dose modification using CAVG1W

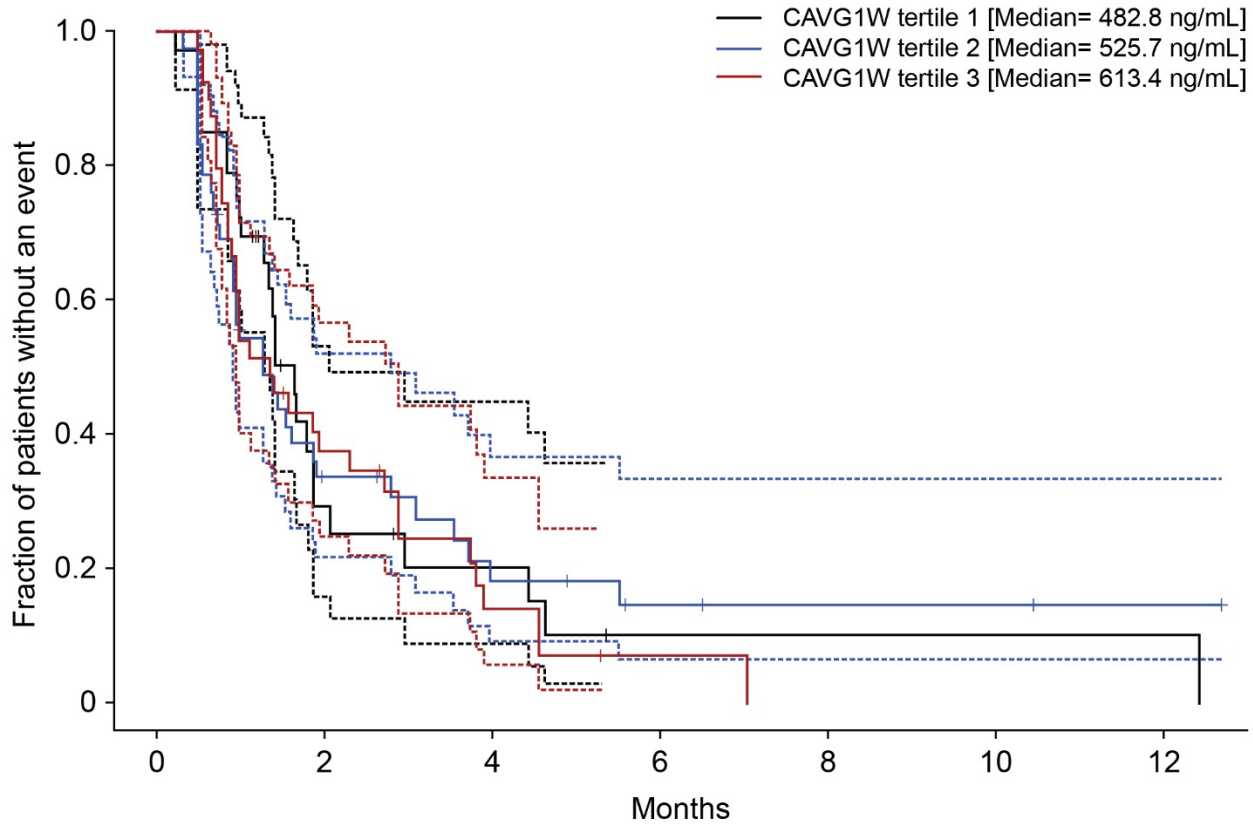

Data derived from 114 patients with at least one measurable cabozantinib concentration and dose modification after the first week of treatment in COSMIC-311

Note: Dashed lines represent 95% confidence intervals for each exposure tertile. One patient had a dose modification event before Day 7 and was excluded from the analysis

CAVG1W predicted average cabozantinib concentration for the first week of treatment

Fig. S3 Kaplan-Meier plot for hypertension (BP data, Grade  $\geq 3$ ) by average exposure tertile

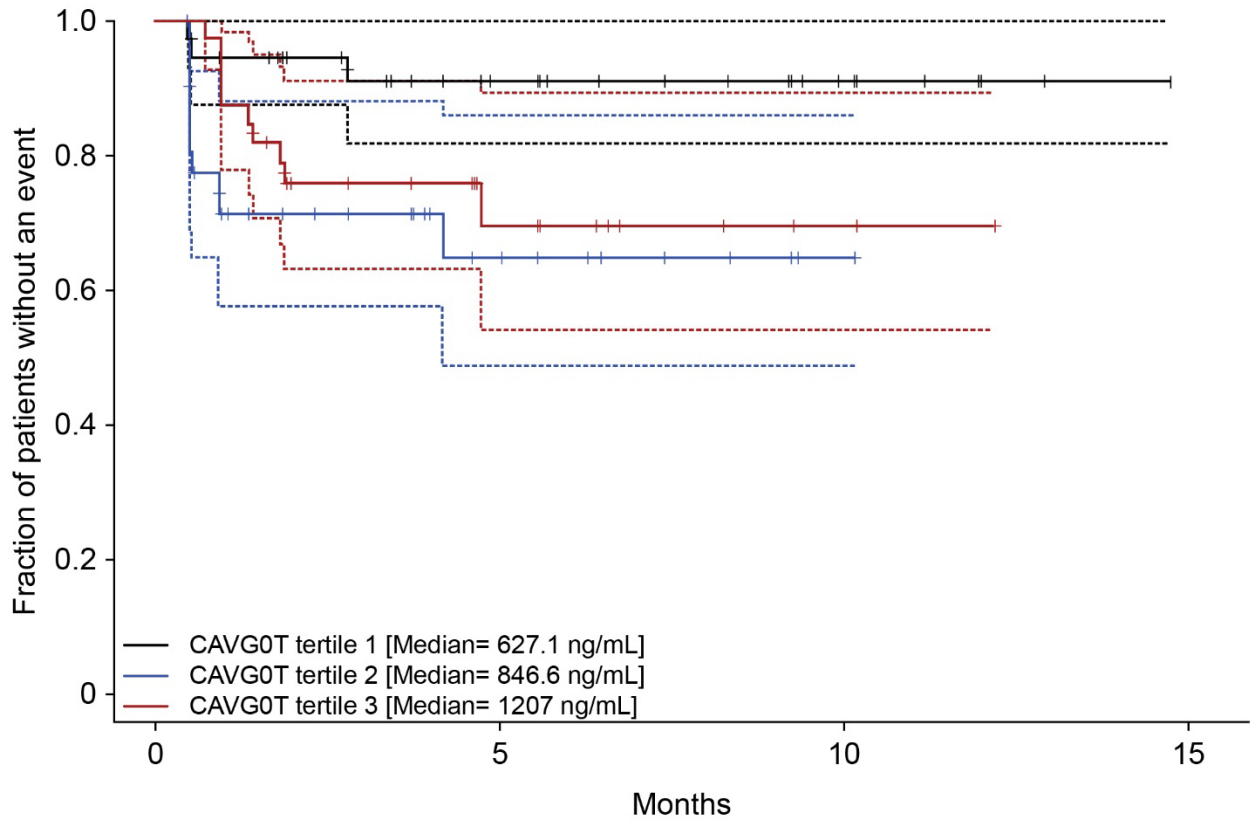

Data derived from 115 patients with at least one measurable cabozantinib concentration in COSMIC-311

Note: Dashed lines represent 95% confidence intervals for each exposure tertile

BP blood pressure, CAVG0T predicted average cabozantinib concentration from time zero to the event or censoring time

Fig. S4 Kaplan-Meier plot for hypertension (MedDRA, Grade  $\geq 3$ ) by average exposure tertile

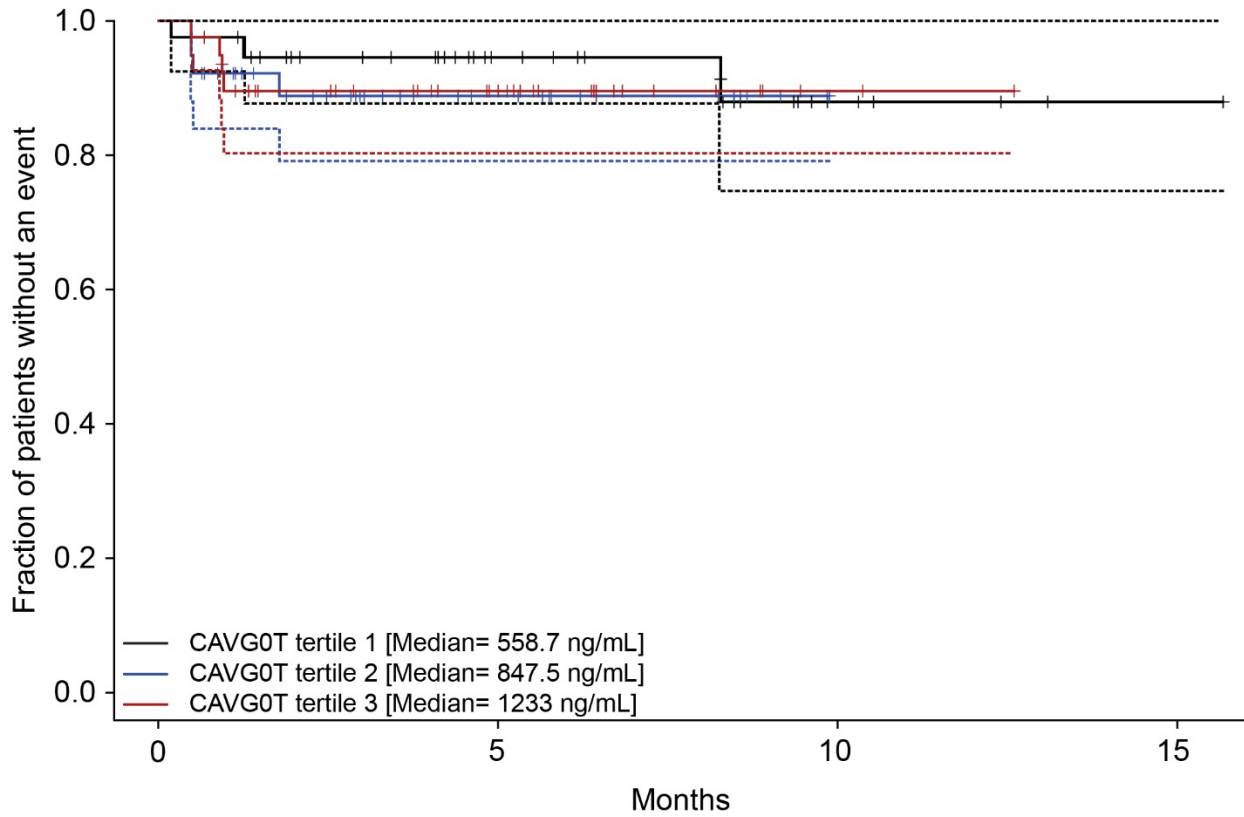

Data derived from 115 patients with at least one measurable cabozantinib concentration in COSMIC-311

Note: Dashed lines represent 95% confidence intervals for each exposure tertile

*CAVG0T* predicted average cabozantinib concentration from time zero to the event or censoring time, *MedDRA* Medical Dictionary for Regulatory Activities

Fig. S5 Kaplan-Meier plot for fatigue/asthenia (Grade  $\geq 3$ ) by average exposure tertile

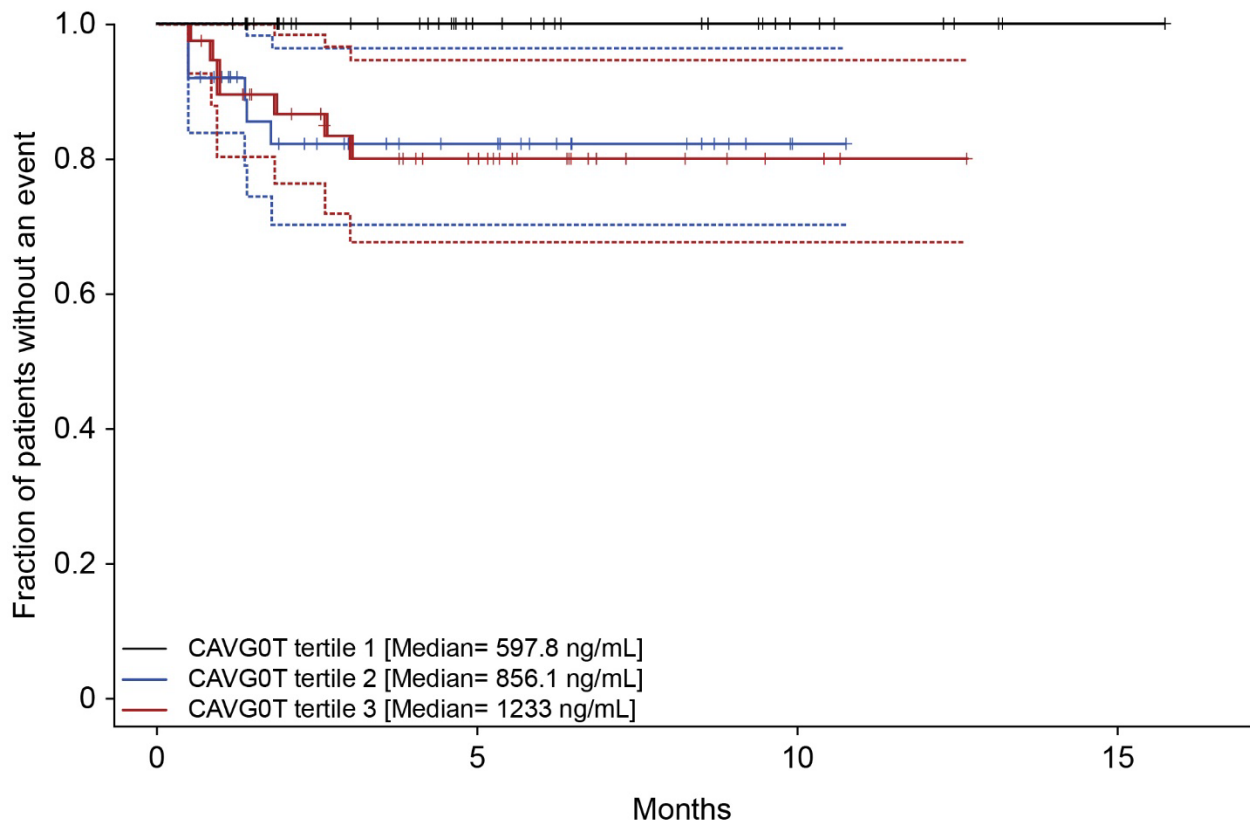

Data derived from 115 patients with at least one measurable cabozantinib concentration in COSMIC-311

Note: Dashed lines represent 95% confidence intervals for each exposure tertile

CAVG0T predicted average cabozantinib concentration from time zero to the event or censoring time

Fig. S6 Kaplan-Meier plot for PPE (Grade  $\geq 1$ ) by average exposure tertile

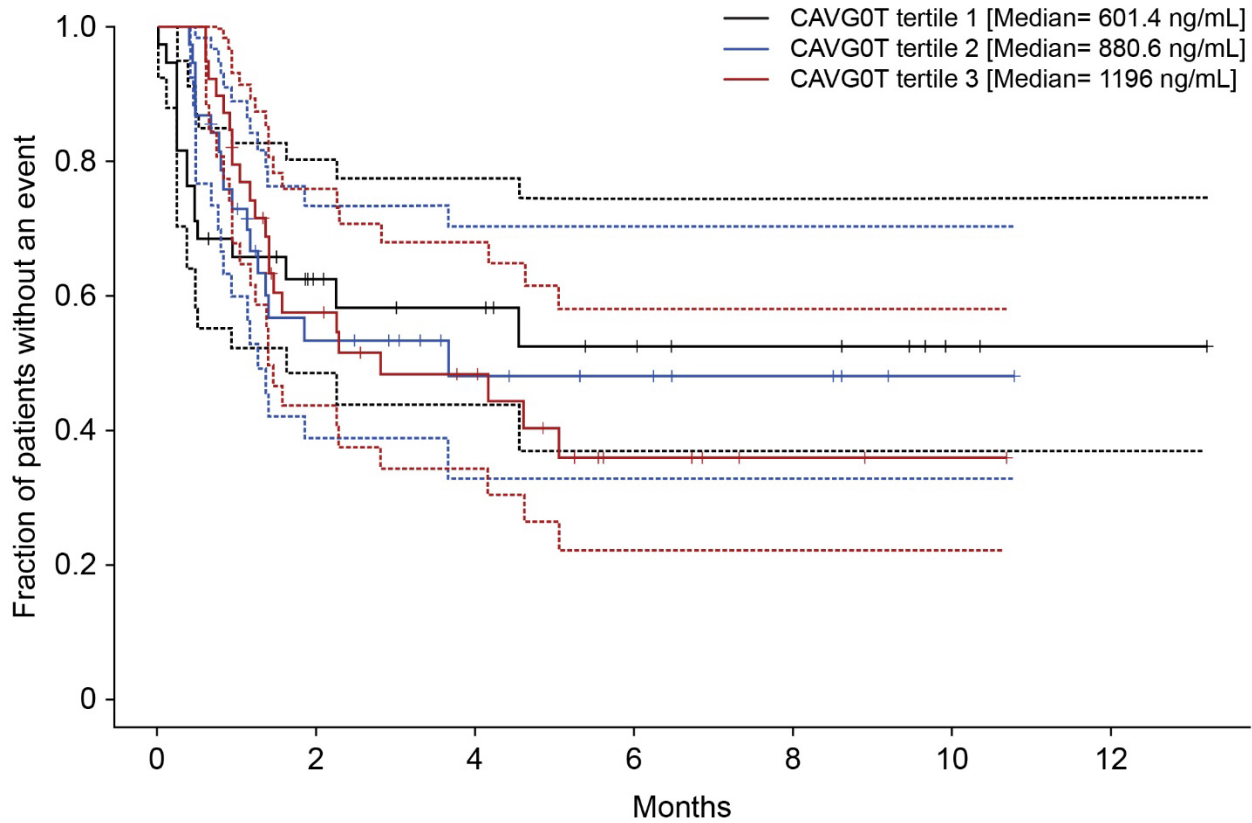

Data derived from 115 patients with at least one measurable cabozantinib concentration in COSMIC-311

Note: Dashed lines represent 95% confidence intervals for each exposure tertile

*CAVG0T* predicted average cabozantinib concentration from time zero to the event or censoring time, *PPE* palmar-plantar erythrodysesthesia

Fig. S7 Kaplan-Meier plot for diarrhea (Grade  $\geq 3$ ) by average exposure tertile

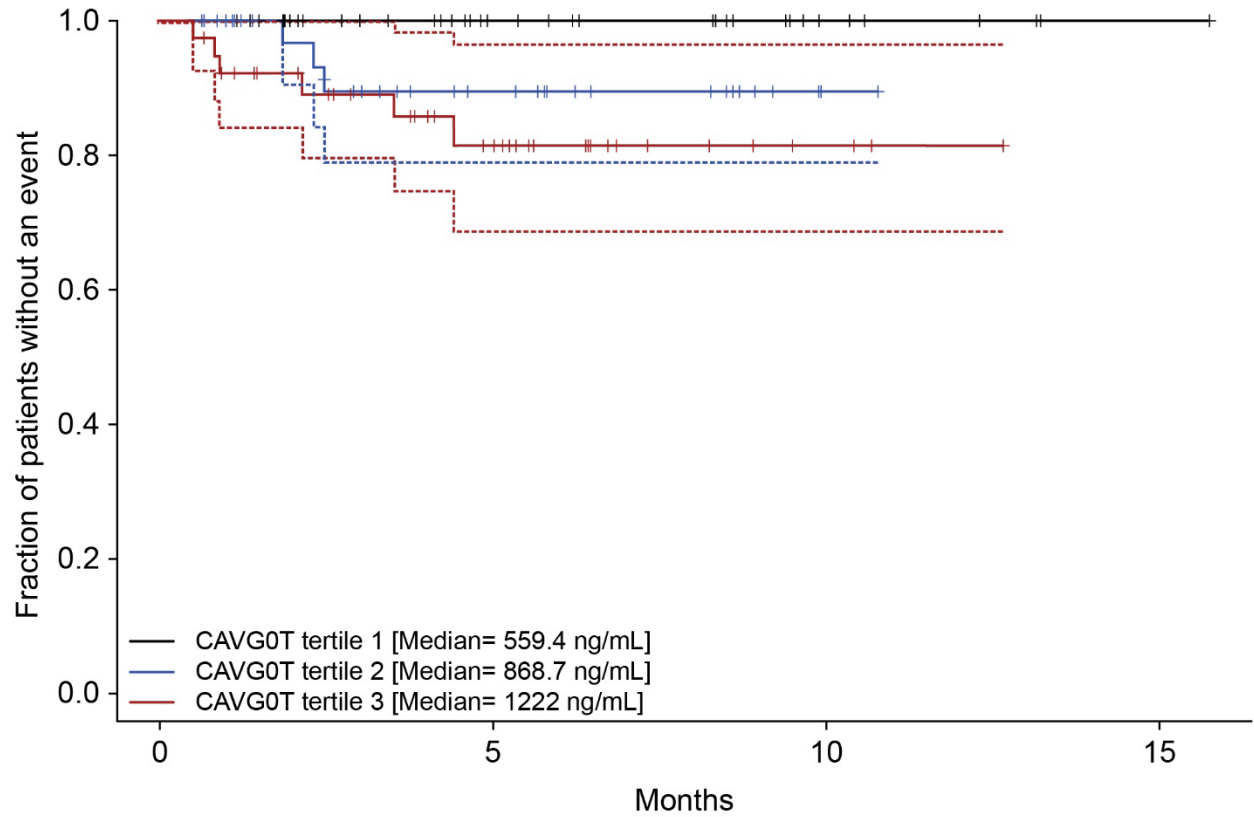

Data derived from 115 patients with at least one measurable cabozantinib concentration in COSMIC-311

Note: Dashed lines represent 95% confidence intervals for each exposure tertile

*CAVG0T* predicted average cabozantinib concentration from time zero to the event or censoring time

Fig. S8 Kaplan-Meier plot for nausea/vomiting (Grade  $\geq 3$ ) by average exposure tertile

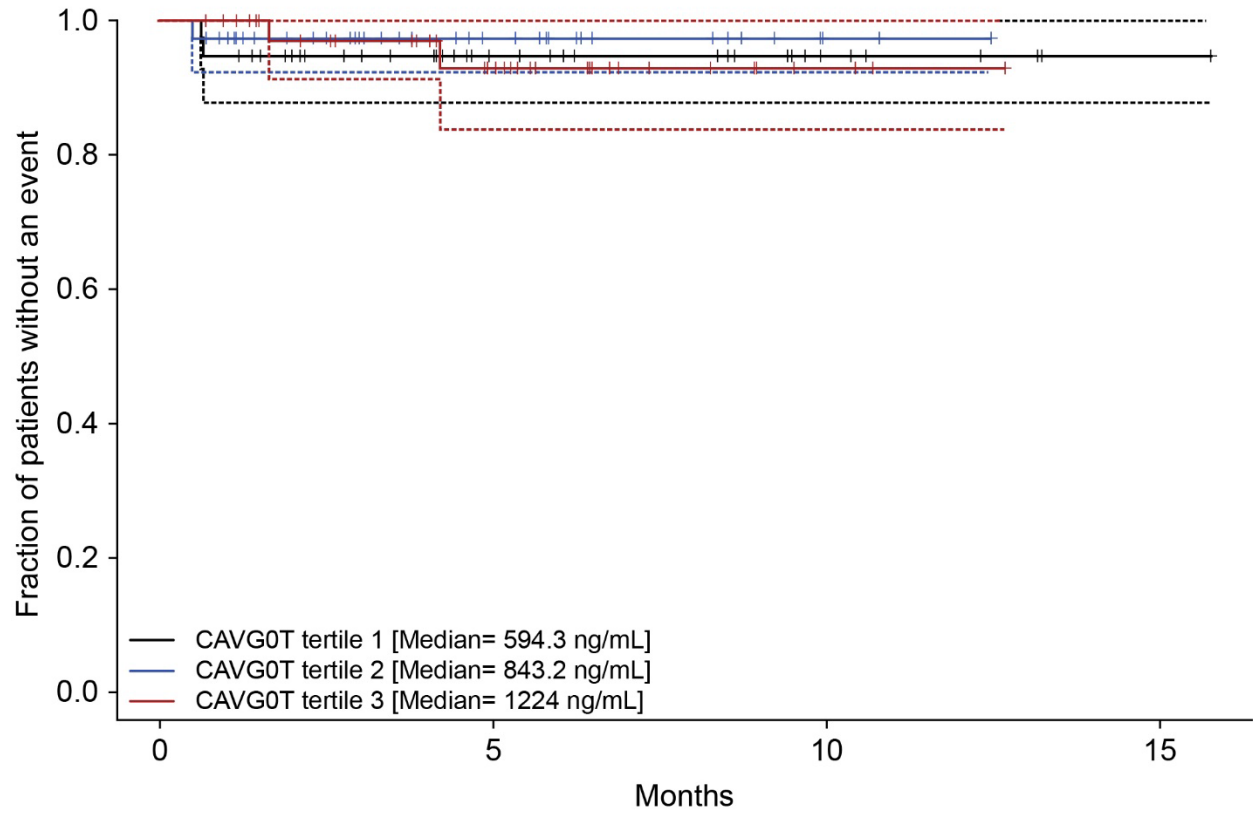

Data derived from 115 patients with at least one measurable cabozantinib concentration in COSMIC-311

Note: Dashed lines represent 95% confidence intervals for each exposure tertile

CAVG0T predicted average cabozantinib concentration from time zero to the event or censoring time



Fig. S9 Kaplan-Meier plot for mucositis/stomatitis (Grade  $\geq 3$ ) by average exposure tertile

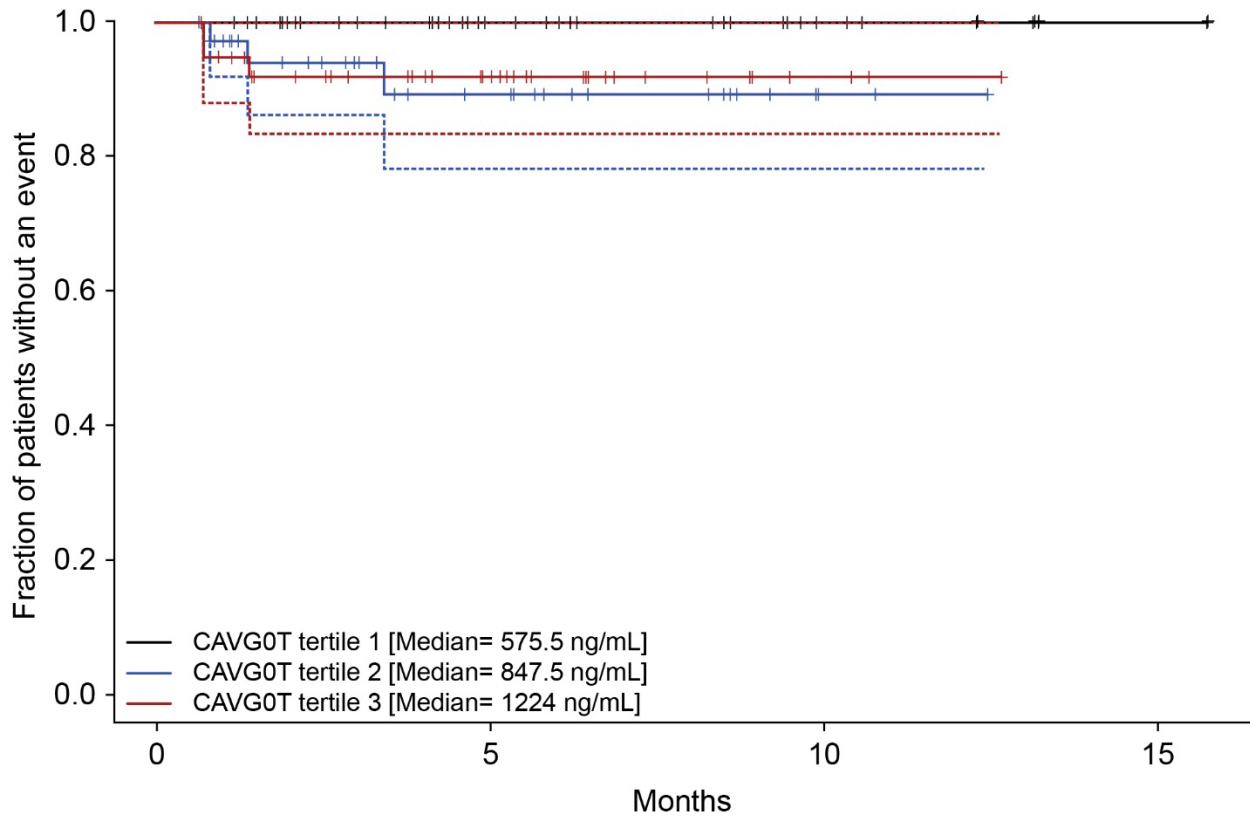

Data derived from 115 patients with at least one measurable cabozantinib concentration in COSMIC-311

Note: Dashed lines represent 95% confidence intervals for each exposure tertile

CAVG0T predicted average cabozantinib concentration from time zero to the event or censoring time

**Fig. S10** Kaplan-Meier plot for ALT/AST elevation (Grade  $\geq 3$ ) by average exposure tertile

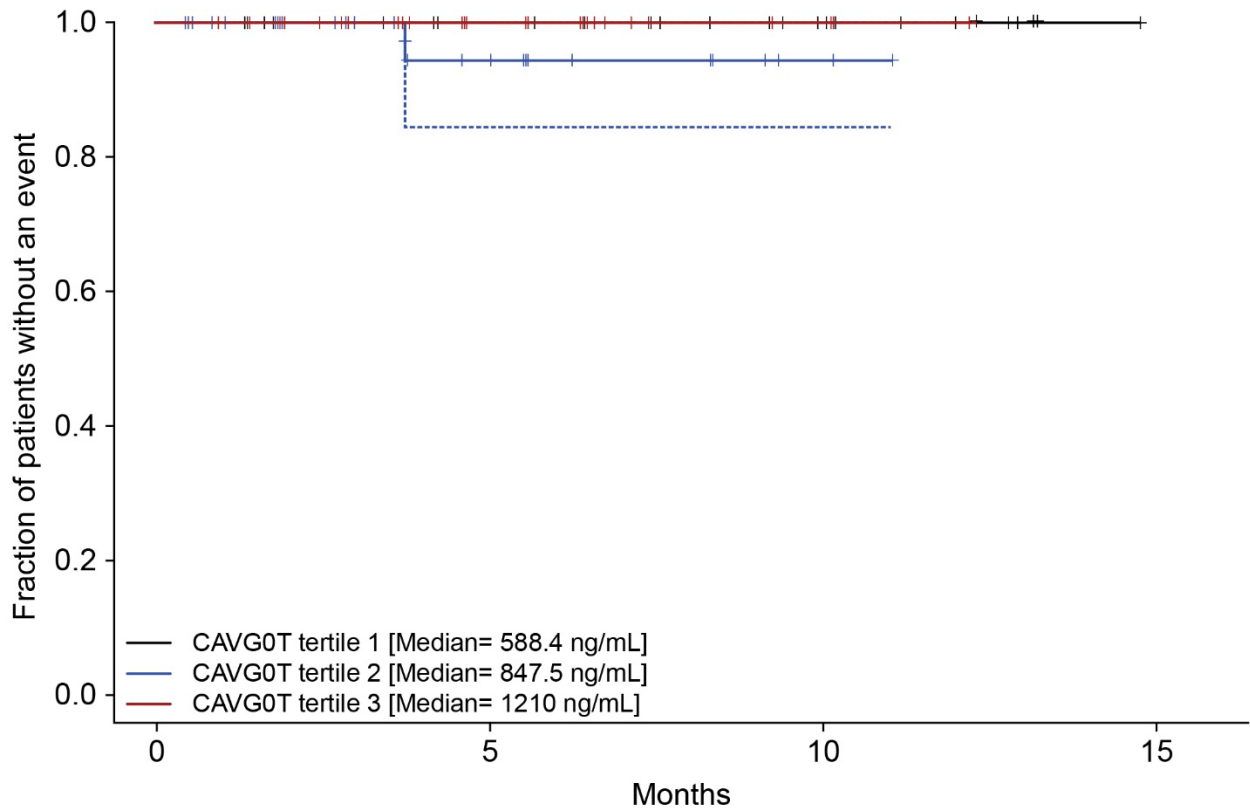

Data derived from 110 patients with at least one measurable cabozantinib concentration and valid post-baseline ALT/AST measurements in COSMIC-311

Note: Dashed lines represent 95% confidence intervals for each exposure tertile

*ALT* alanine aminotransferase, *AST* aspartate aminotransferase, *CAVG0T* predicted average cabozantinib concentration from time zero to the event or censoring time
